# Supplementary material for: Insight into the impact of EGFR L792Y/F/H mutations on sensitivity to osimertinib: anin silicostudy
Source: Royal Society of Chemistry journal article supplement (doi:10.1039/d0nj05570k), 2021-01-01
Supplement: d0nj05570k1.pdf [file d0nj05570k1.pdf]

**Table S1.** Experimental binding free energy converted from IC<sub>50</sub> values (kcal/mol).

| System name | Exp IC <sub>50</sub><br>(nM) | Δ G <sub>exp</sub><br>(kcal/mol) |
|-------------|------------------------------|----------------------------------|
| T790M       | 3.48                         | -11.53                           |
| T790M/L792F | 10.04                        | -10.90                           |
| T790M/L792Y | 33.04                        | -10.20                           |
| T790M/L792H | 90.43                        | -9.60                            |

Δ G<sub>exp</sub>: Experimental binding free energies are calculated from IC<sub>50</sub> using the following relationship:  $\Delta G_{\text{binding}} = RT \ln K_{\text{dissociated}} = RT \ln(IC_{50} + 0.5C_{\text{enzyme}}) \approx RT \ln IC_{50}$ , where R is ideal gas constant, T is temperature in K (298 K is used in this paper), C<sub>enzyme</sub> is the concentration of enzyme, which is a very small number after equilibration and can be omitted in most cases, and IC<sub>50</sub> values refer to this paper[1].

**Table S2.** PMF value calculated on each window (kcal/mol).

| windows | T790M | T790M/L791F | T790M/L791Y | T790M/L791H |
|---------|-------|-------------|-------------|-------------|
| 0       | 0.00  | 0.00        | 0.00        | 0.00        |
| 1       | 0.12  | 0.10        | 0.38        | 0.81        |
| 2       | 0.88  | 0.76        | 1.35        | 1.94        |
| 3       | 2.21  | 1.86        | 2.64        | 3.29        |
| 4       | 3.82  | 3.35        | 3.57        | 4.09        |
| 5       | 5.32  | 4.99        | 3.99        | 4.21        |
| 6       | 6.56  | 5.64        | 4.43        | 4.20        |
| 7       | 7.09  | 5.77        | 4.71        | 4.15        |
| 8       | 7.31  | 6.02        | 4.91        | 4.12        |
| 9       | 7.52  | 6.22        | 5.25        | 4.20        |
| 10      | 7.63  | 6.17        | 5.49        | 4.41        |
| 11      | 7.73  | 6.13        | 5.66        | 4.62        |
| 12      | 7.94  | 6.11        | 5.98        | 4.77        |
| 13      | 8.01  | 6.04        | 6.20        | 5.07        |
| 14      | 7.88  | 6.12        | 6.34        | 5.51        |
| 15      | 7.89  | 6.52        | 6.58        | 5.91        |
| 16      | 8.16  | 7.07        | 6.94        | 6.24        |
| 17      | 8.73  | 7.43        | 7.36        | 6.44        |
| 18      | 9.52  | 7.58        | 7.73        | 6.39        |
| 19      | 9.86  | 7.83        | 8.04        | 6.32        |
| 20      | 9.78  | 7.81        | 8.32        | 6.29        |
| 21      | 9.72  | 7.63        | 8.44        | 6.44        |
| 22      | 9.82  | 7.72        | 8.36        | 6.74        |
| 23      | 10.07 | 8.00        | 8.21        | 6.88        |
| 24      | 10.19 | 8.35        | 8.11        | 6.91        |
| 25      | 10.26 | 8.71        | 8.08        | 6.99        |
| 26      | 10.49 | 8.94        | 8.21        | 7.24        |
| 27      | 10.71 | 9.03        | 8.45        | 7.50        |
| 28      | 10.89 | 9.06        | 8.48        | 7.57        |
| 29      | 11.13 | 9.15        | 8.33        | 7.57        |
| 30      | 11.45 | 9.39        | 8.36        | 7.69        |
| 31      | 11.67 | 9.48        | 8.48        | 7.74        |
| 32      | 11.78 | 9.45        | 8.55        | 7.73        |
| 33      | 11.69 | 9.48        | 8.64        | 7.98        |
| 34      | 11.43 | 9.56        | 8.87        | 8.49        |
| 35      | 11.39 | 9.64        | 9.04        | 8.89        |
| 36      | 11.42 | 9.71        | 9.16        | 8.96        |
| 37      | 11.31 | 9.80        | 9.29        | 9.02        |
| 38      | 11.30 | 9.81        | 9.28        | 9.04        |
| 39      | 11.41 | 9.71        | 9.29        | 8.94        |

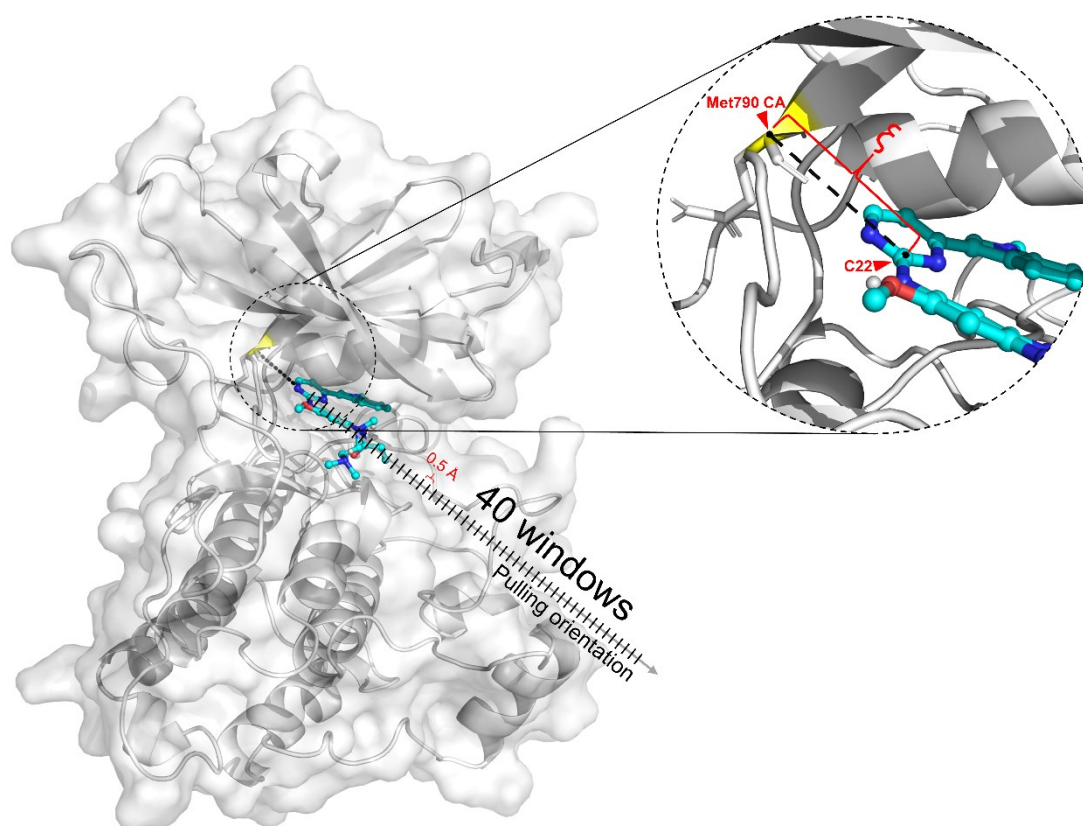

**Figure S1.** The computational modelling of the EGFR-ligand unbinding path estimated using the US approach. The inhibitor was pulled along the reaction coordinate  $\xi$ . The reaction coordinate  $\xi$  was defined by the actual distance of  $CA_{Met790}-C22_{Osimertinib}$

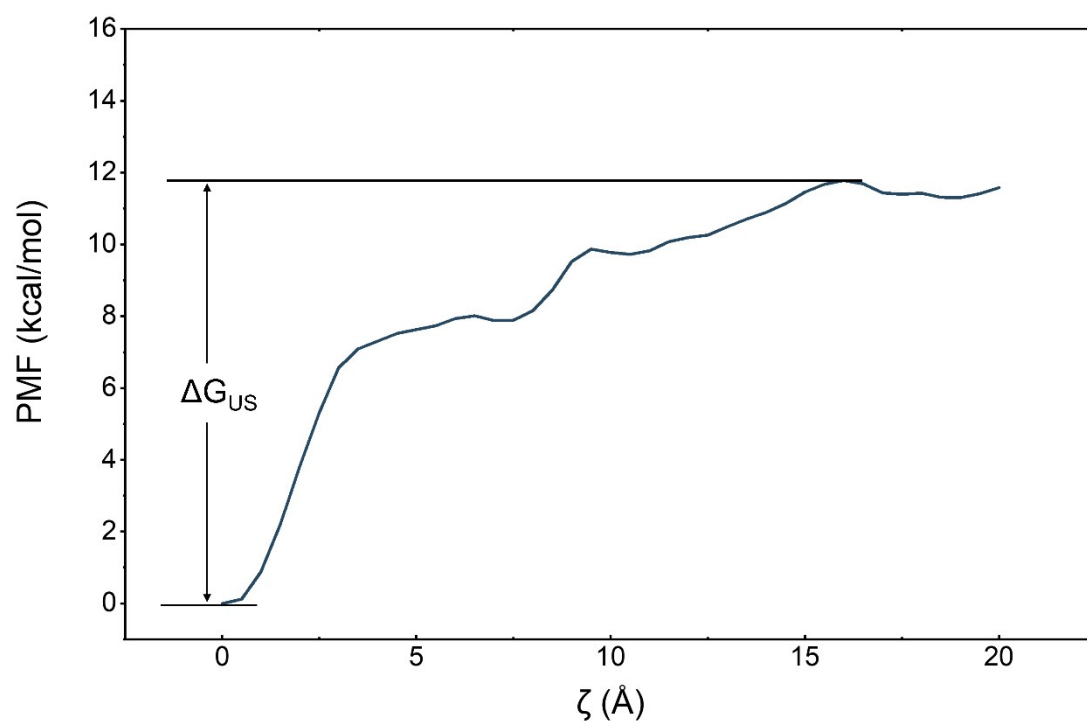

**Figure S2.** The free energy profile of the AZD9291/EGFR T790M system was obtained via WHAM analysis. The binding free energy  $\Delta G_{US}$  was described as the difference between the lowest and largest PMF values.

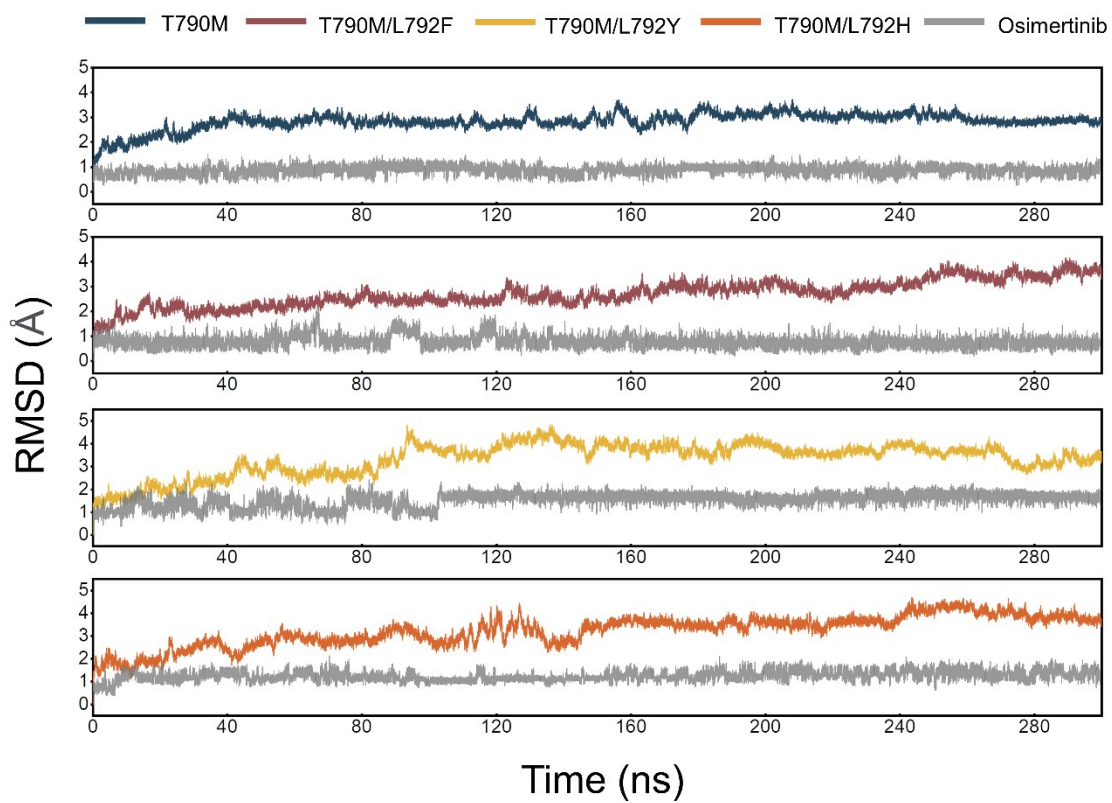

**Figure S3.** Backbone (CA, C, N atoms) RMSDs are shown as a function of time for EGFR mutants and Osimertinib during 300ns molecular dynamics simulation, using the first frame of the production trajectory as reference.

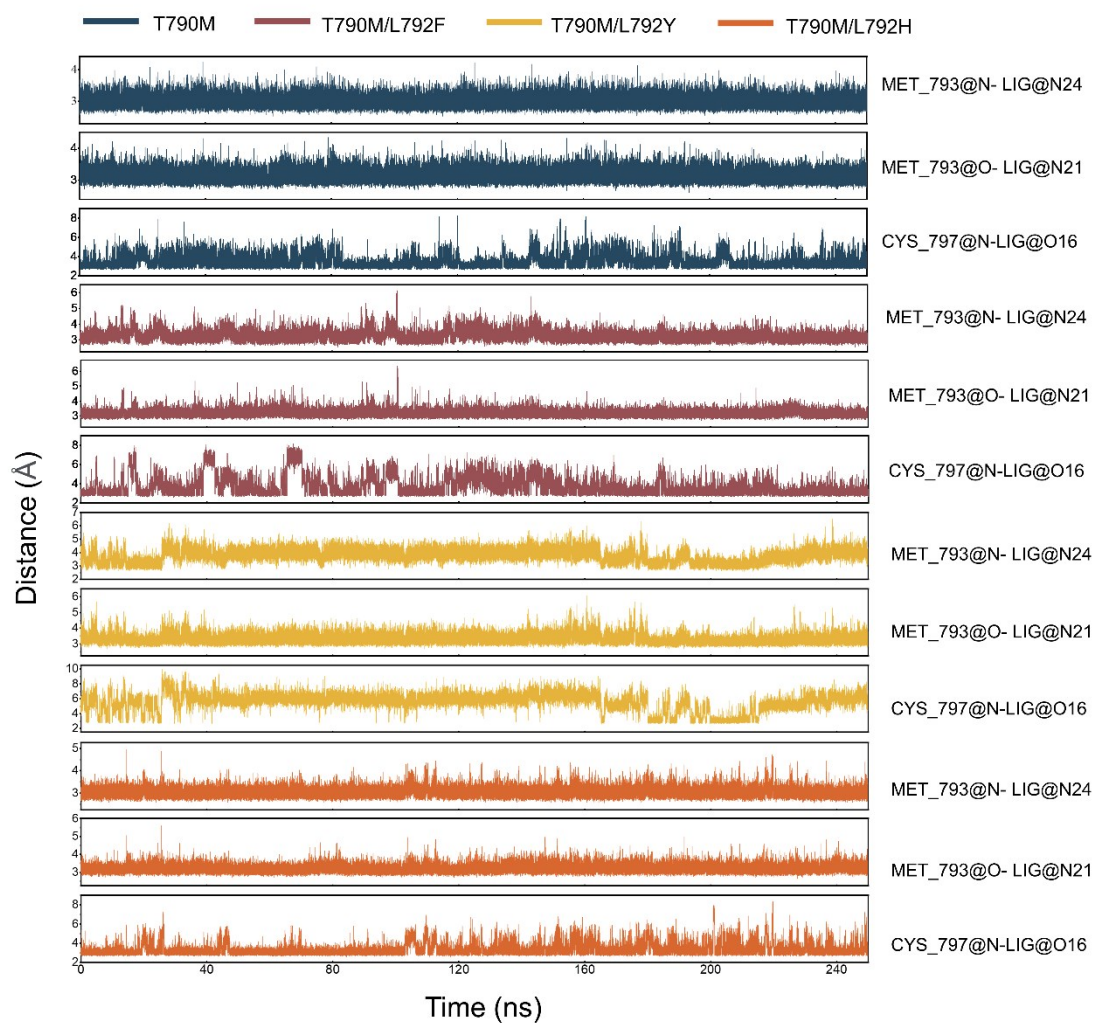

**Figure S4.** The distance for the hydrogen bonds between Osimertinib and EGFR as a function of time. Here we mainly consider the distance of hydrogen bonds MET\_793@N-LIG@N24, MET\_793@O-LIG@N21, and CYS\_797@N-LIG@O16.

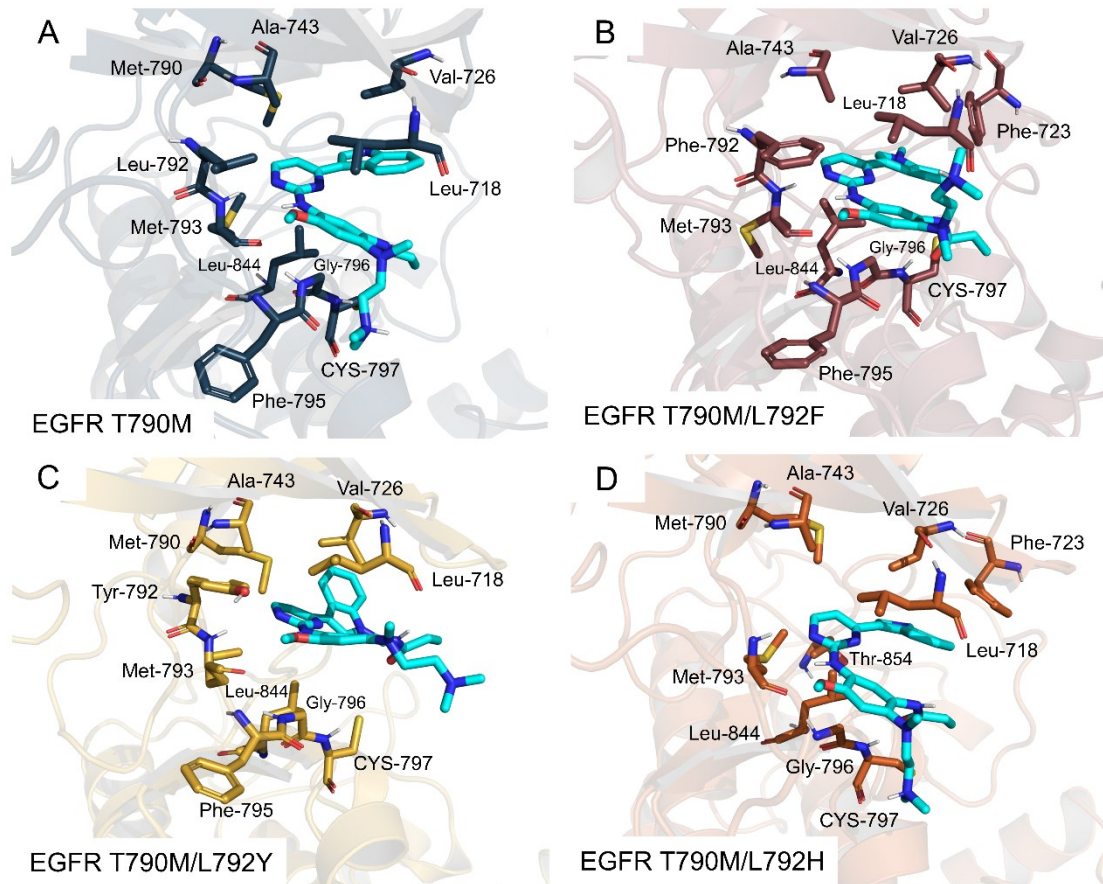

**Figure S5.** Structure analysis of Osimertinib binding to the ATP-binding pocket of EGFR mutants.

## **References**

[1] Z. Yang, N. Yang, Q. Ou, Y. Xiang, T. Jiang, X. Wu, H. Bao, X. Tong, X. Wang, Y.W. Shao, Y. Liu, Y. Wang, C. Zhou, Investigating Novel Resistance Mechanisms to Third-Generation EGFR Tyrosine Kinase Inhibitor Osimertinib in Non-Small Cell Lung Cancer Patients, *Clin Cancer Res* 24(13) (2018) 3097-3107.
